# Supplementary material for: Chromatographic and Spectroscopic Identification and Recognition of Natural Dyes, Uncommon Dyestuff Components, and Mordants: Case Study of a 16th Century Carpet with Chintamani Motifs
Source: PubMed Central journal article supplement (PMC6017628; doi:10.3390/molecules23020339), 2018-02-06
Supplement: molecules-23-00339-s001.pdf [file molecules-23-00339-s001.pdf]

**HPLC separation**

|                    |                                                                     |     |     |
|--------------------|---------------------------------------------------------------------|-----|-----|
| Column             | Poroshell EC-C18 (3.0×150 mm),<br>2.7 μm, Agilent Technologies      |     |     |
| Column temperature | 40 °C                                                               |     |     |
| Injection volume   | 2 μL                                                                |     |     |
| Flow rate          | 0.4 mL min <sup>-1</sup>                                            |     |     |
| Eluents            | (A) 0.1 % HCOOH in water,<br>(B) 0.1 % HCOOH in ACN/MeOH (1:1; v/v) |     |     |
| Gradient program   | Time, min                                                           | % A | % B |
|                    | 0                                                                   | 90  | 10  |
|                    | 2                                                                   | 90  | 10  |
|                    | 20                                                                  | 0   | 100 |
|                    | 30                                                                  | 0   | 100 |
| Post time          | 10 min                                                              |     |     |

**UV-Vis detection**

|             |                              |
|-------------|------------------------------|
| Wavelengths | UV: 254, 350 nm; Vis: 580 nm |
| Peak width  | > 0.1 min (2 s)              |

**ESI MS detection**

|                        | <b>QQQ</b>                                    | <b>QTOF</b>            |
|------------------------|-----------------------------------------------|------------------------|
| Polarity               | Negative                                      |                        |
| Mode                   | Profile 50-1000 m/z<br>Product ion 50-650 m/z | 50-1000 m/z            |
| Peak width             | 0.07 min                                      | -                      |
| Fragmentor voltage     | 200 V                                         | 100 V                  |
| Sheath gas temperature | 250 °C                                        | 325 °C                 |
| Sheath gas flow        | 11 L min <sup>-1</sup>                        | 10 L min <sup>-1</sup> |
| Drying gas flow        | 5 L min <sup>-1</sup>                         | -                      |
| Drying gas temperature | 300 °C                                        | -                      |
| Nebulizer pressure     | 45 psi                                        | 35 psi                 |
| Capillary voltage      | 3500 V                                        | 3500 V                 |
| VCharging              | 500 V                                         | -                      |
| Collision energy       | 20 V                                          | -                      |

Table S1. Conditions of chromatographic separation and detection of examined colorants

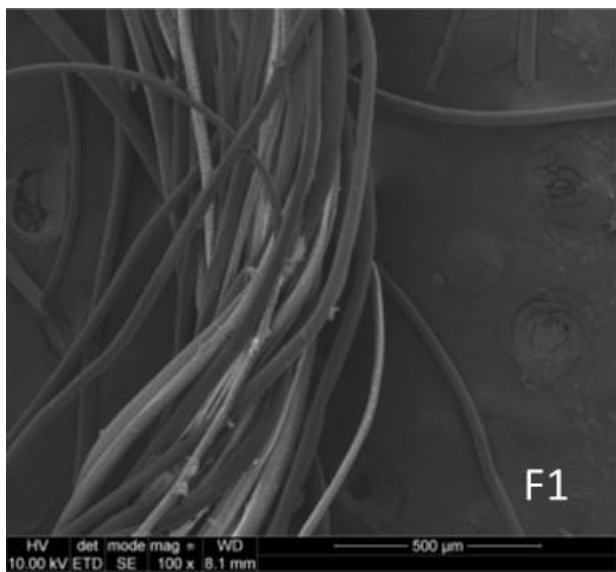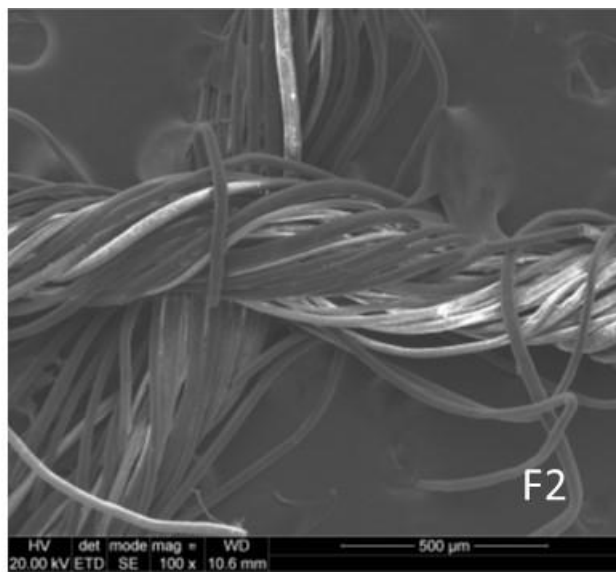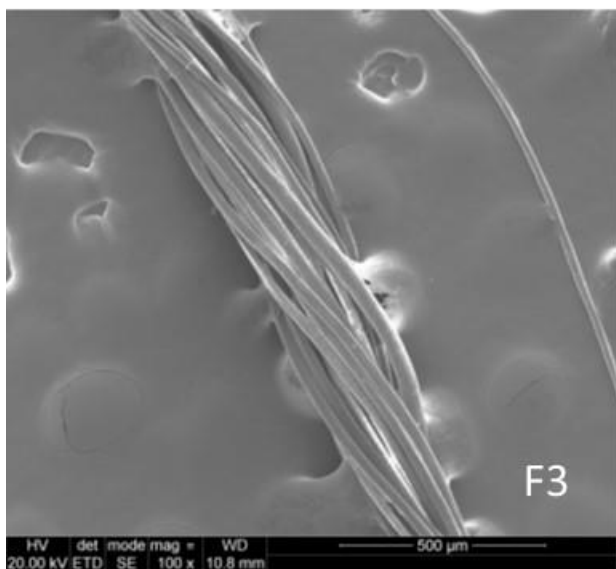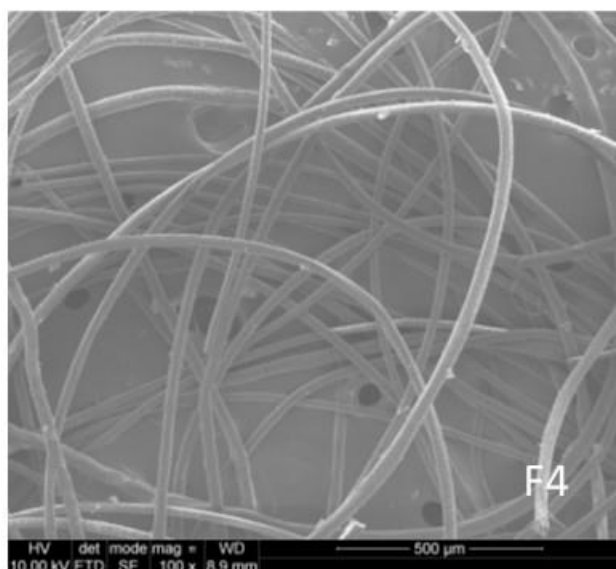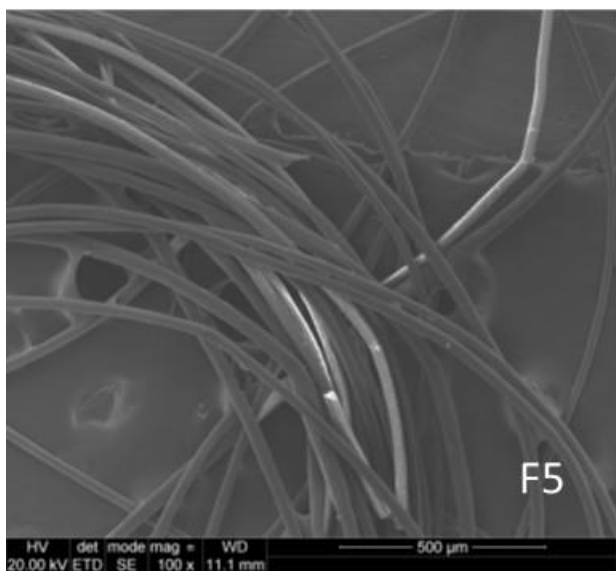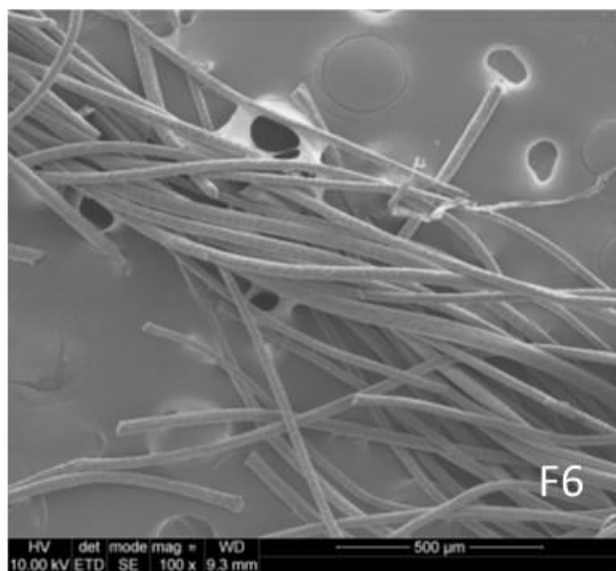

Figure S1. Compilation of SEM images of all tested threads at a magnification of 100x

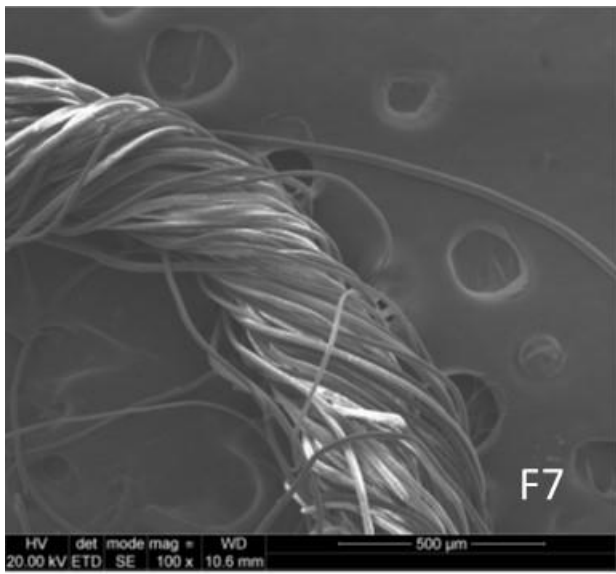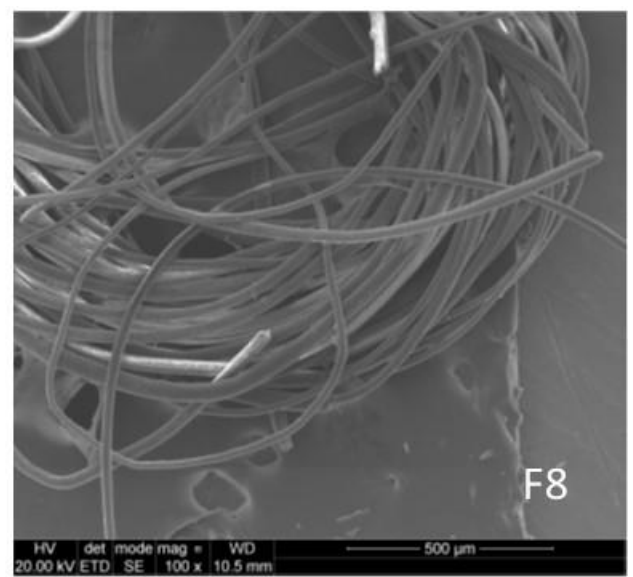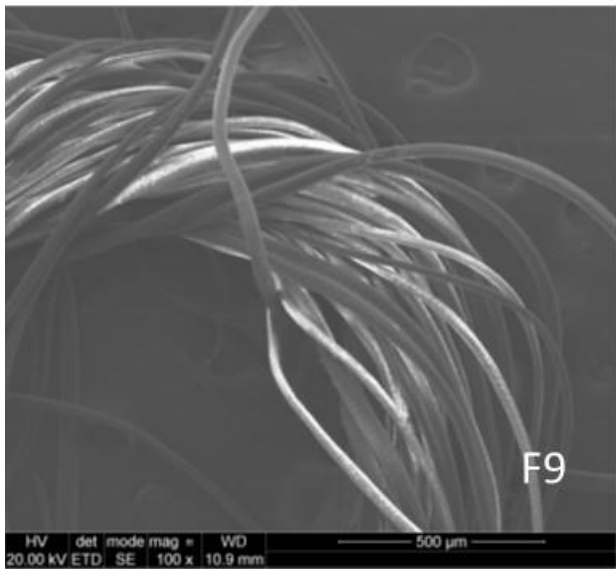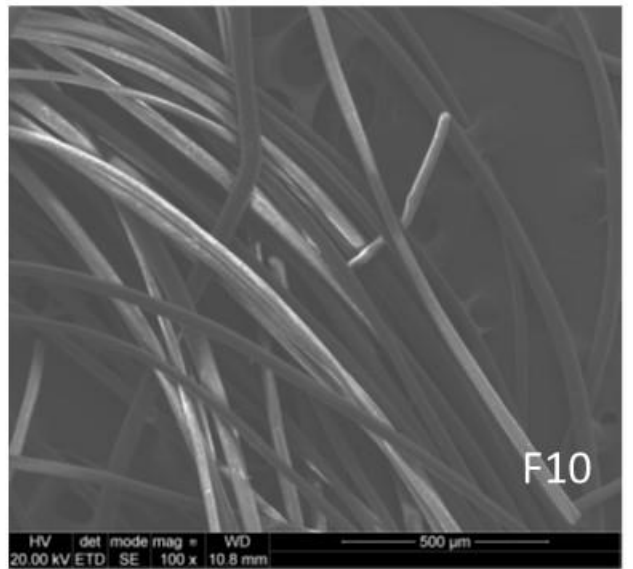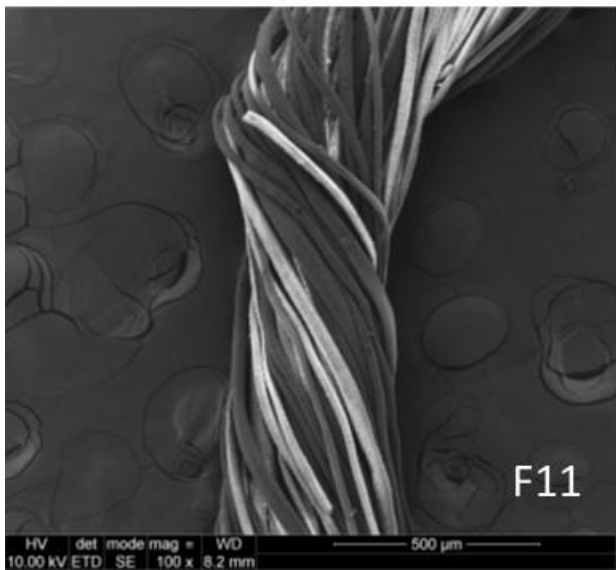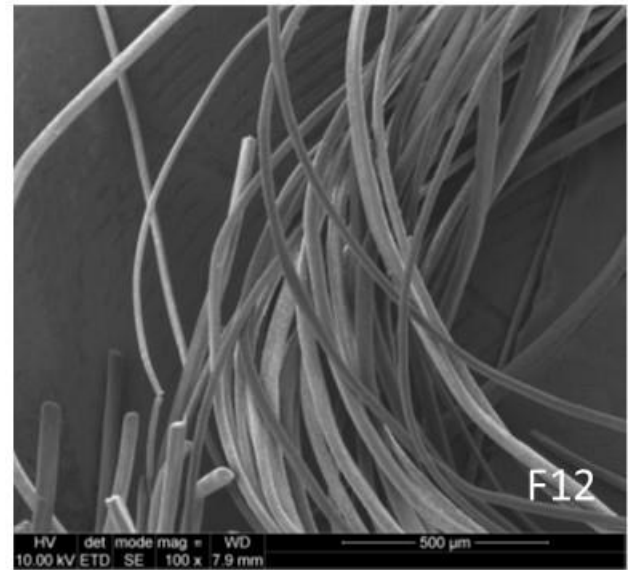

Fig.S1.(cont.) Compilation of SEM images of all tested threads at a magnification of 100x

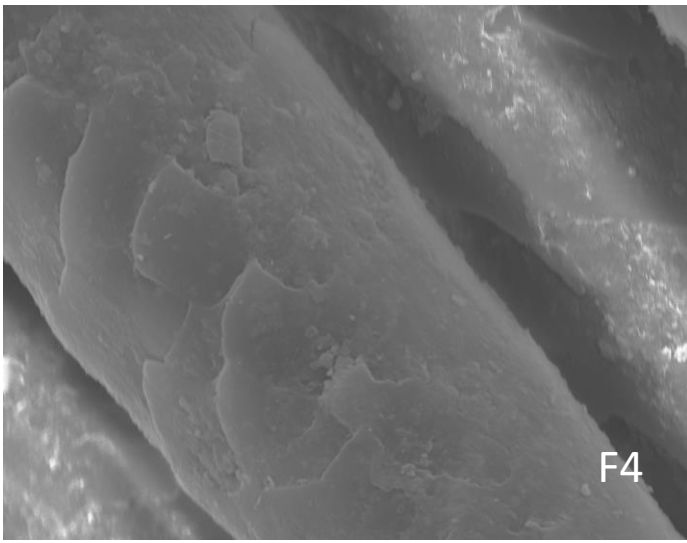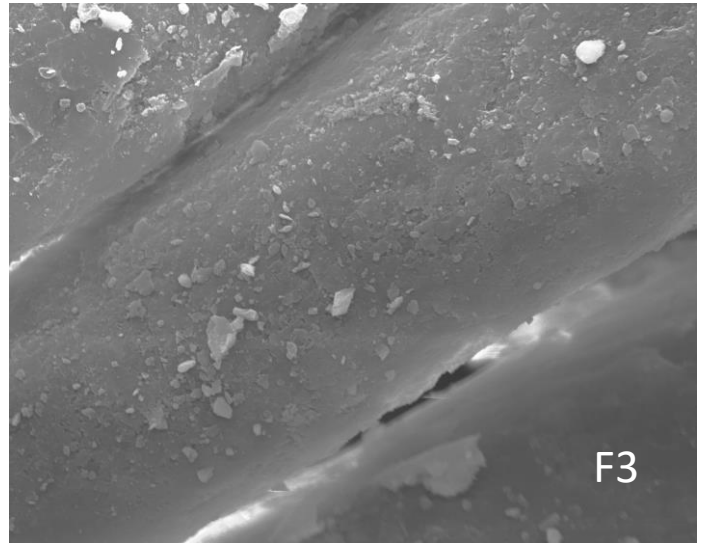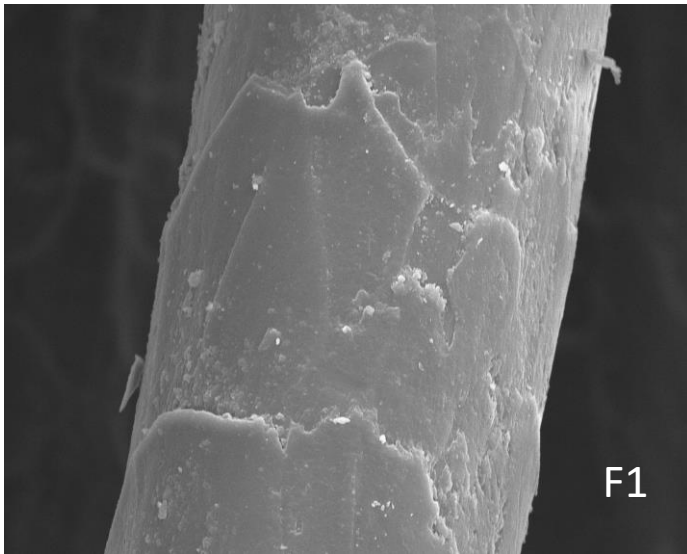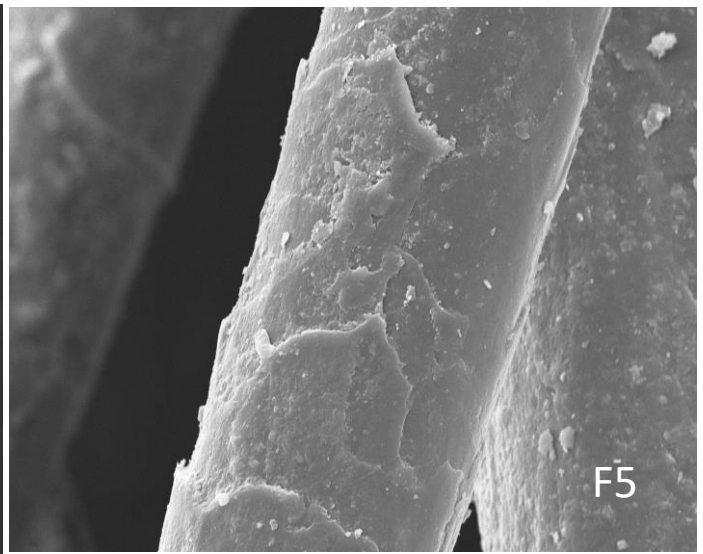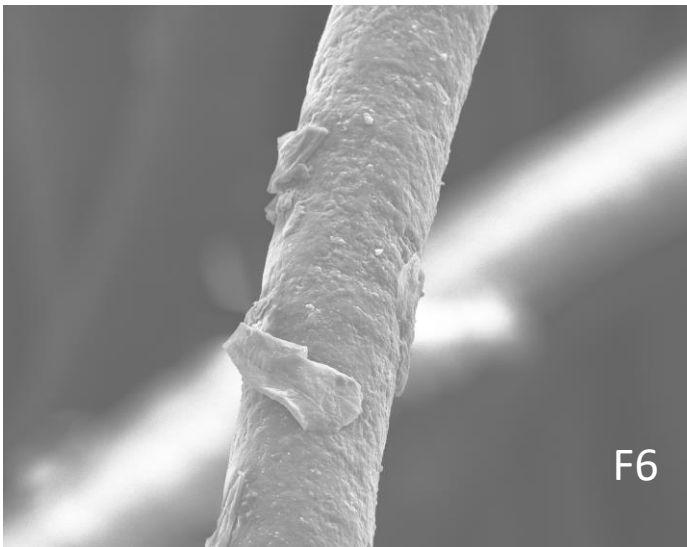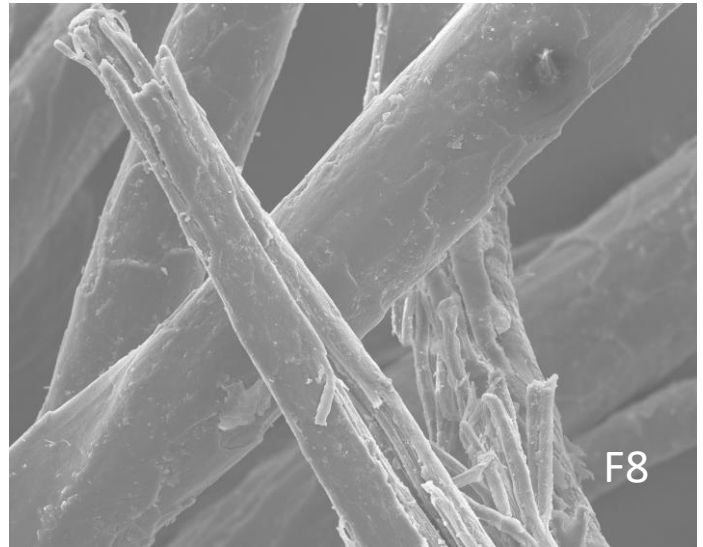

Fig.S1.(cont.) Compilation of SEM images of selected threads at a magnification of 2500x

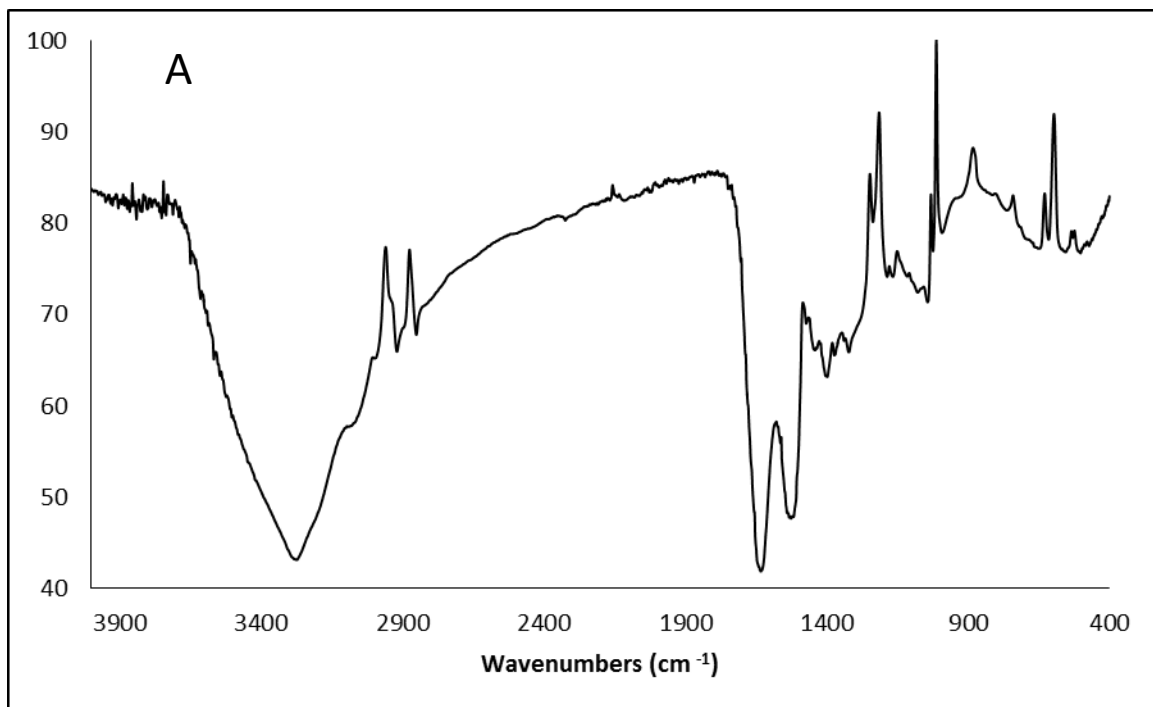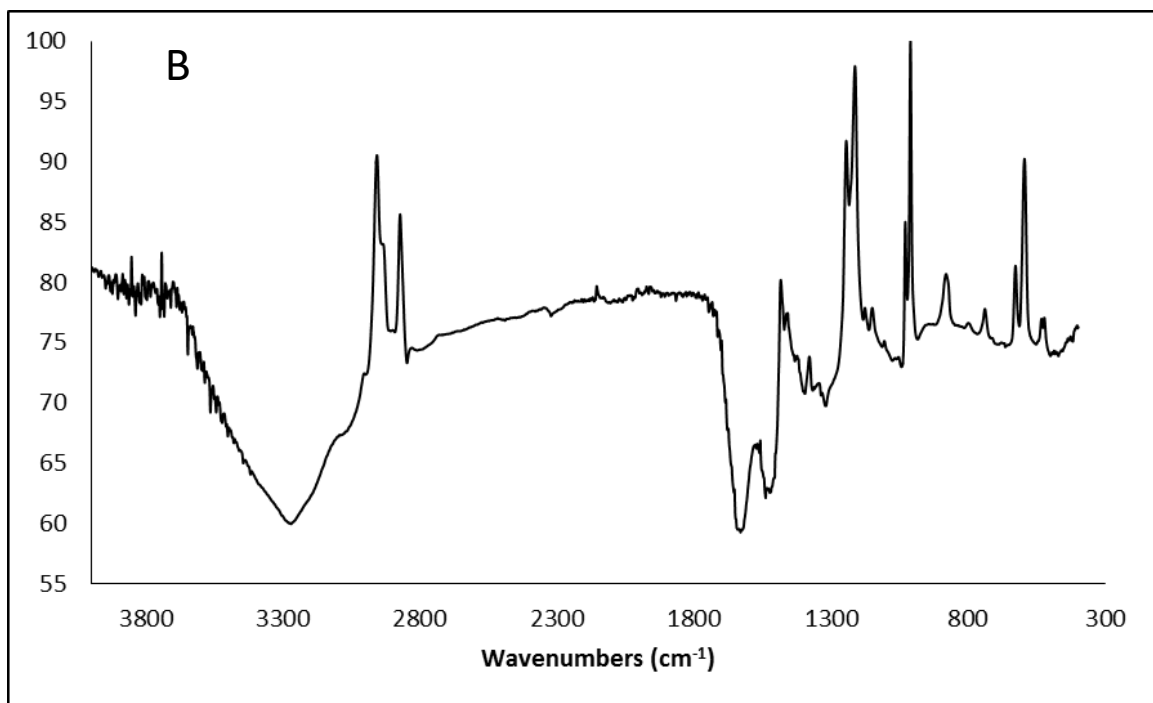

Fig.S2. Typical FT-IR spectra of the selected treads: A- fibre F5, B-fibre F1

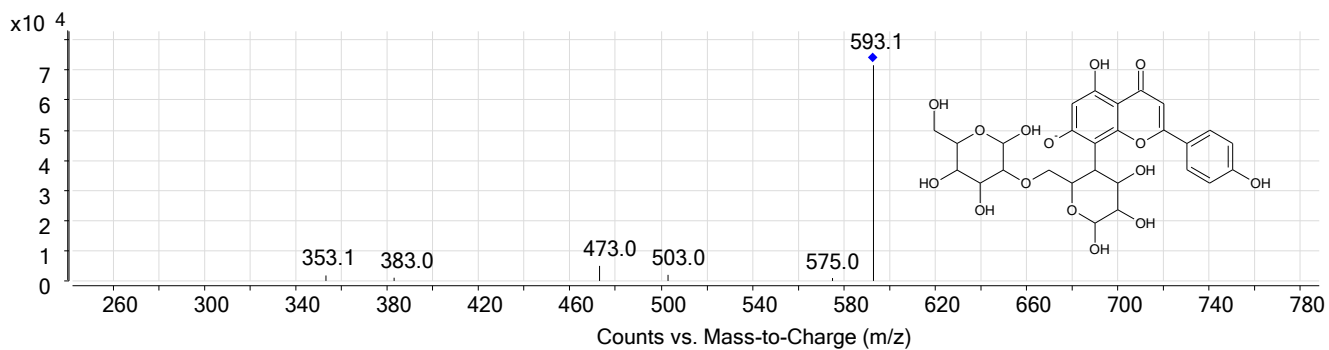

Fig. S3. Mass spectrum of apigenin-C-diglucoside (Y1).

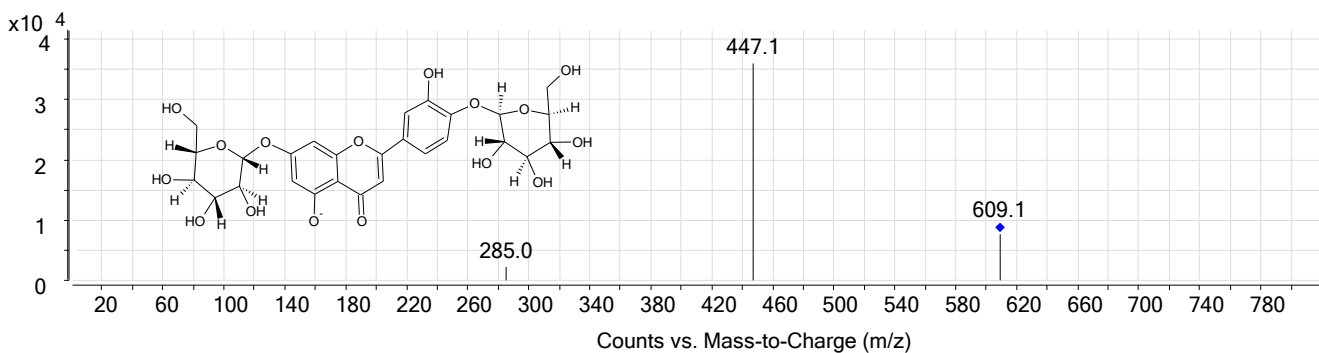

Fig. S4. Mass spectrum of luteolin-O-diglucoside (Y2).

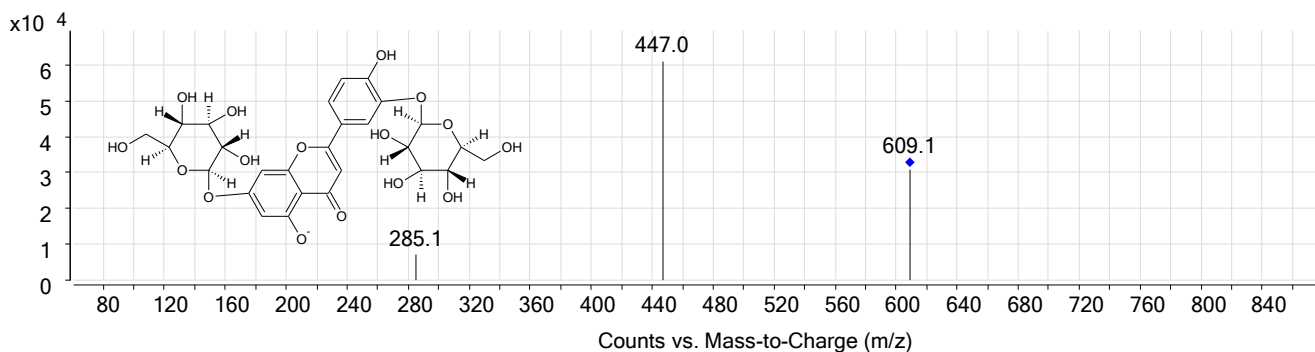

Fig. S5. Mass spectrum of luteolin-3,7'-O-diglucoside (Y3).

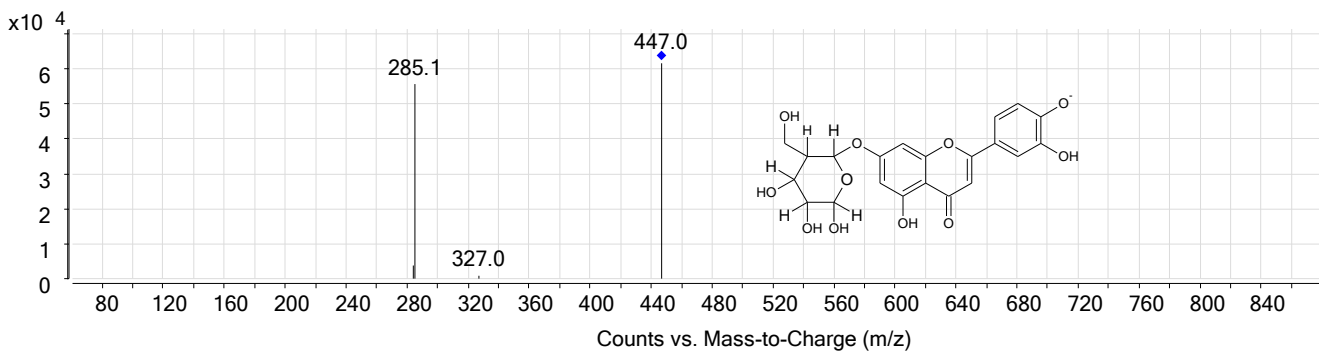

Fig. S6. Mass spectrum of luteolin-7-O-glucoside (Y4).

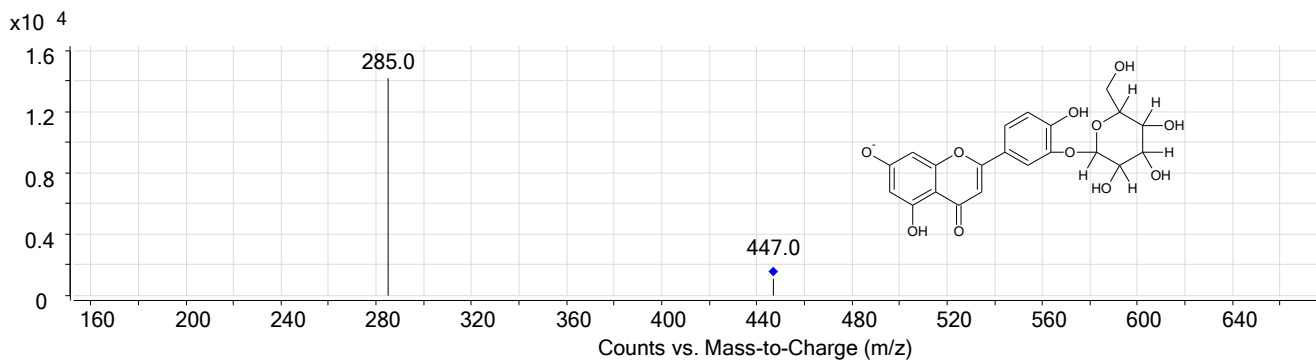

Fig. S7. Mass spectrum of luteolin-*O*-glucoside (Y5).

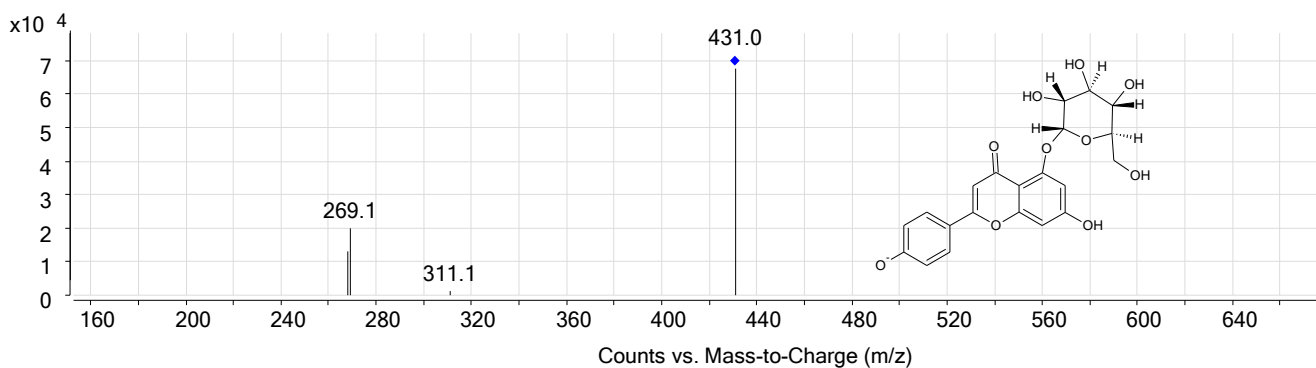

Fig. S8. Mass spectrum of apigenin-7-*O*-glucoside (Y6).

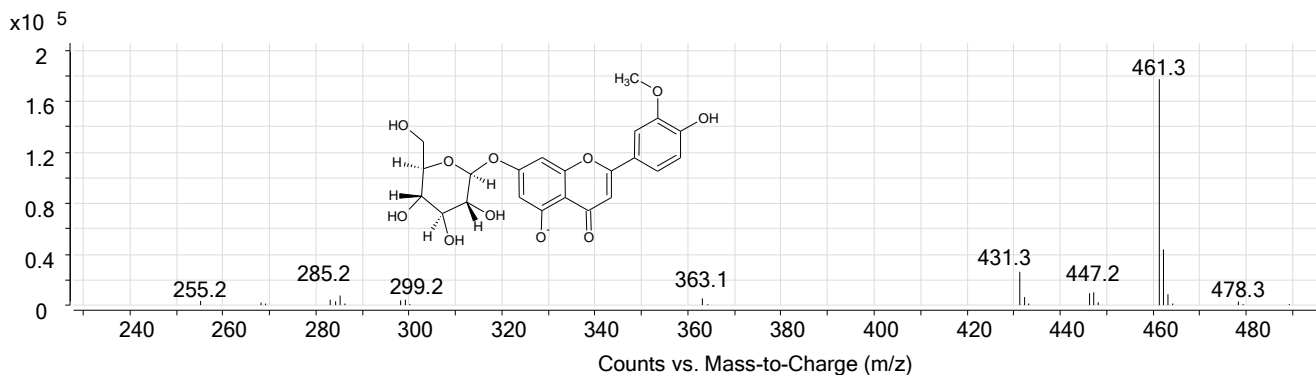

Fig. S9. Mass spectrum of chryseriol-*O*-glucoside (Y7).

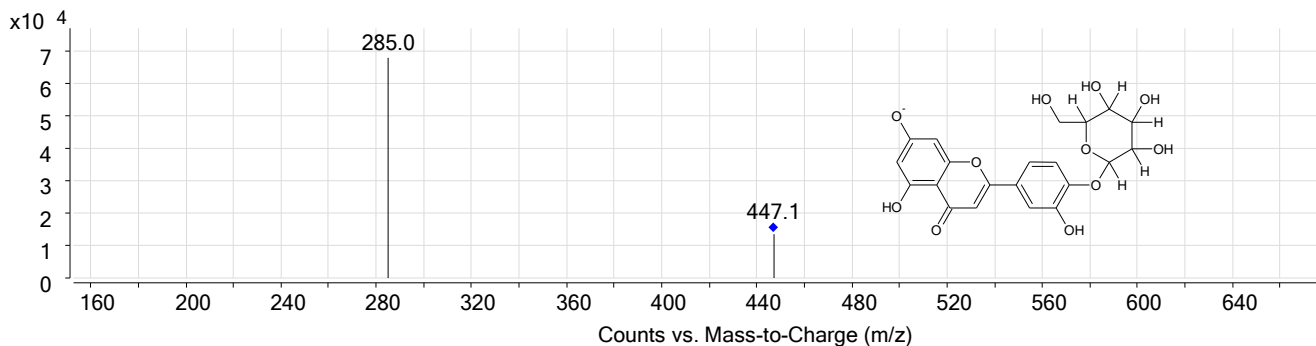

Fig. S10. Mass spectrum of luteolin-4'-*O*-glucoside (Y8).

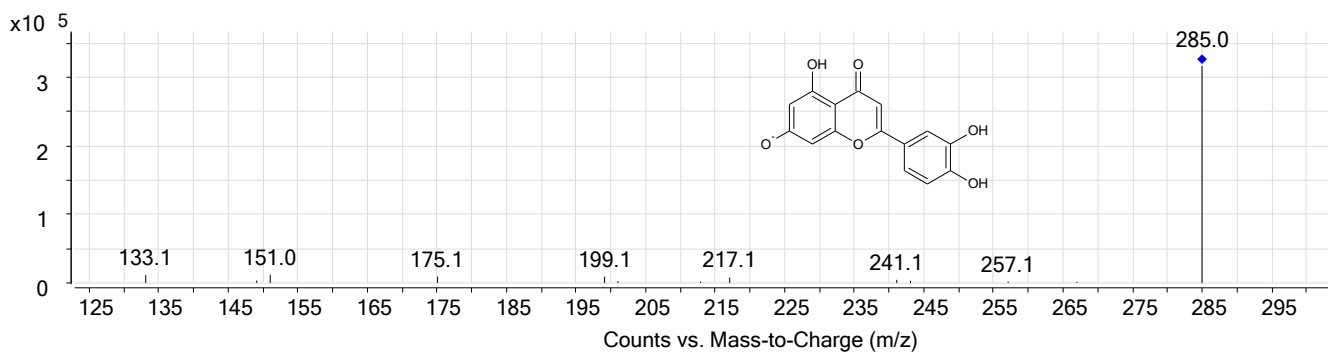

Fig. S11. Mass spectrum of luteolin (Y9).

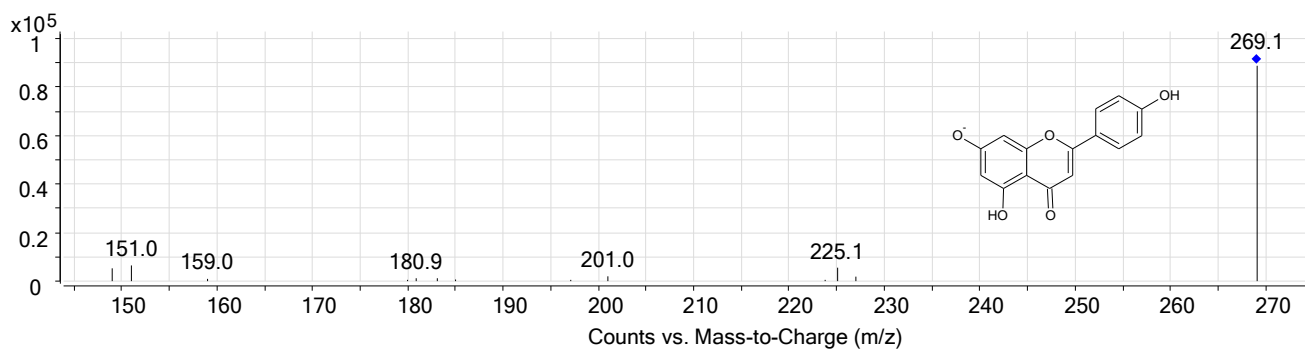

Fig. S12. Mass spectrum of apigenin (Y10).

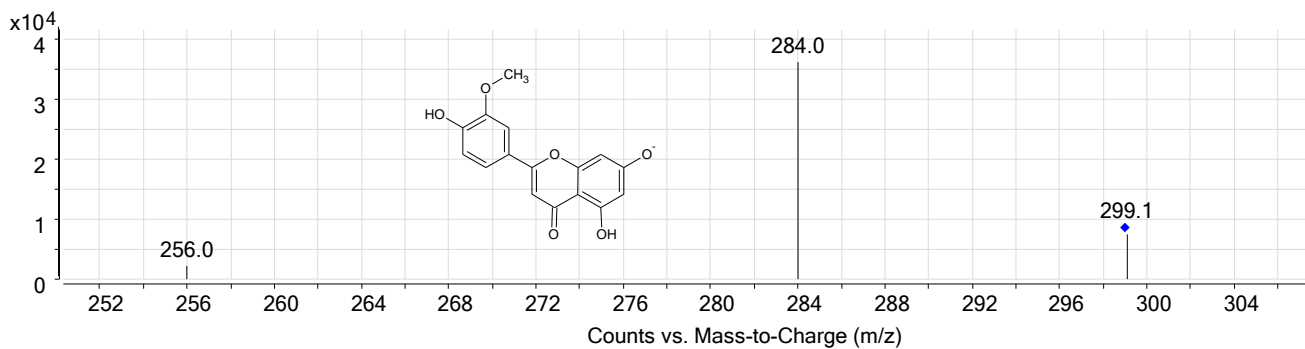

Fig. S13. Mass spectrum of chryseriol (Y11).

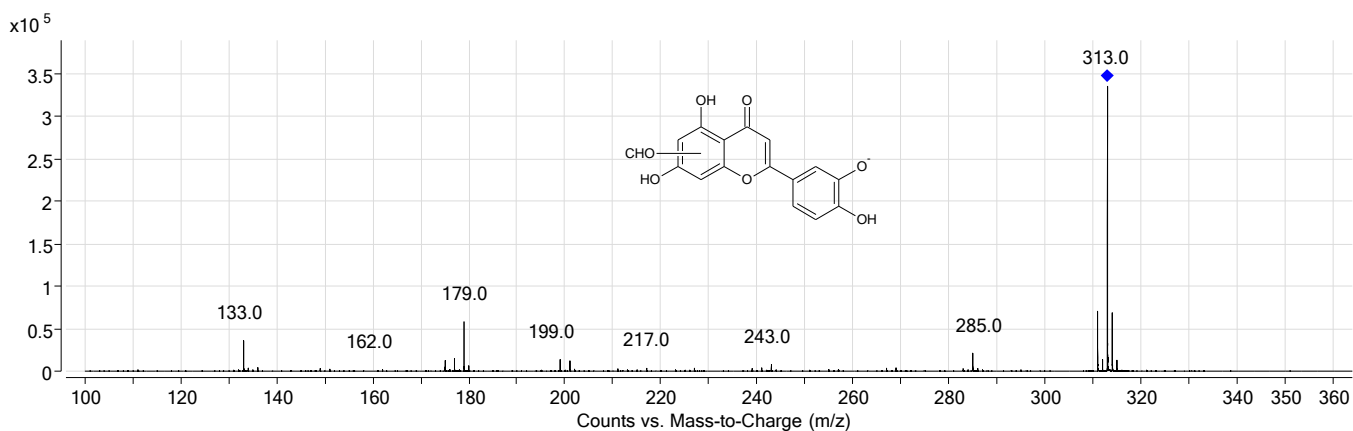

Fig. S14. Mass spectrum of luteolin derivative (Y12).



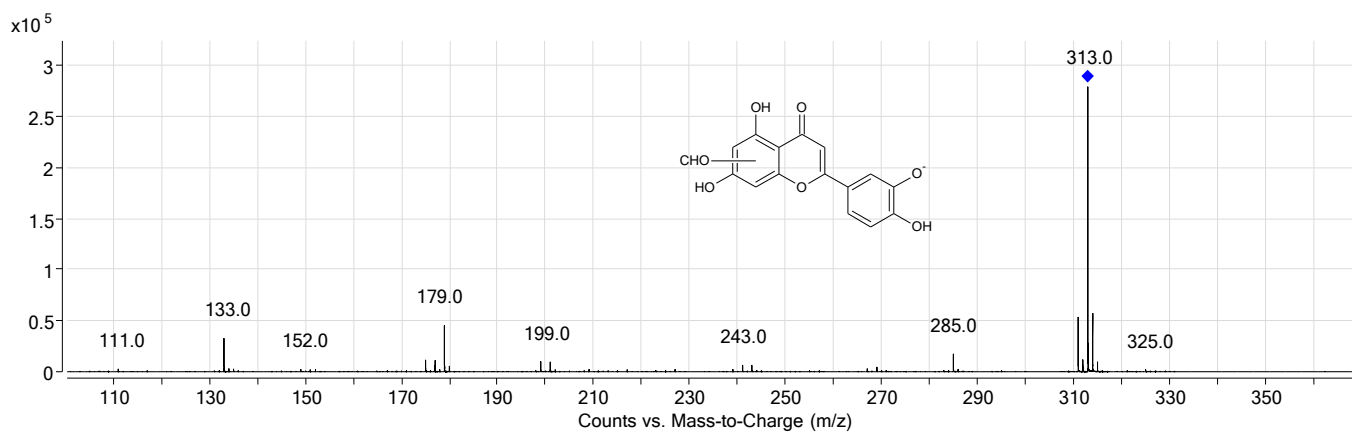

Fig. S15. Mass spectrum of luteolin derivative (Y13).

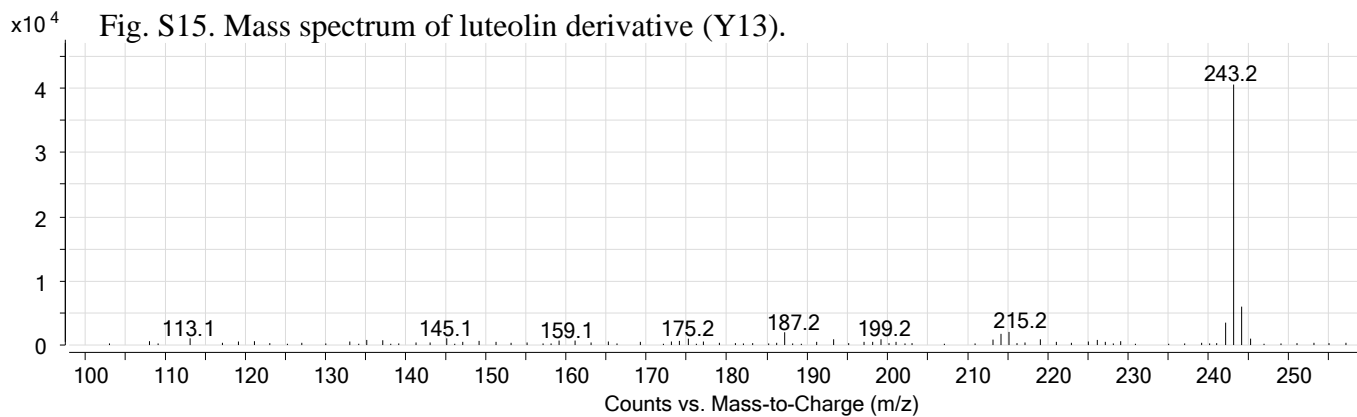

Fig. S16. Mass spectrum of „type C compound” (Y15).

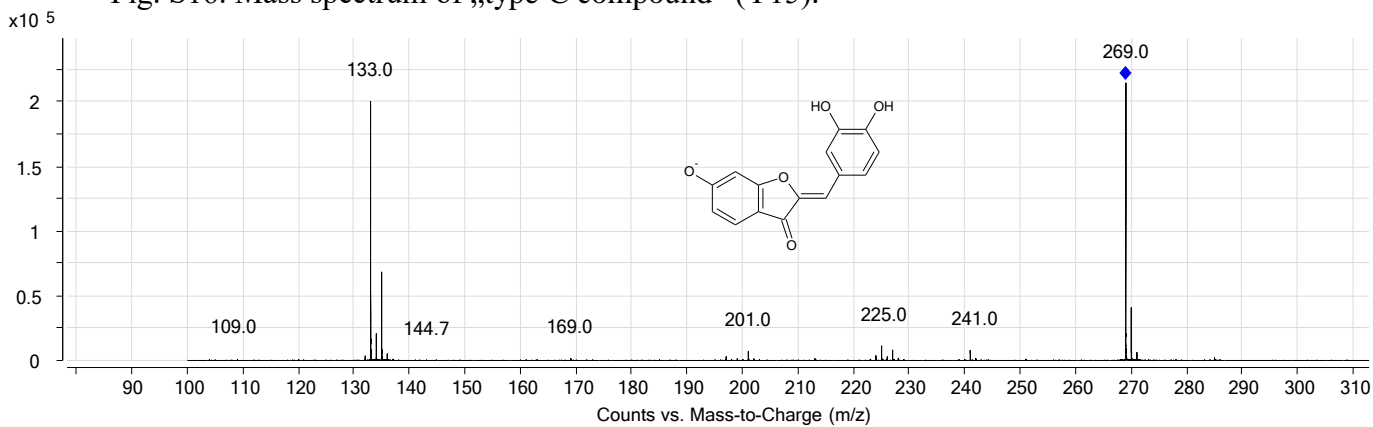

Fig. S17. Mass spectrum of sulfuretin isomer (Y16).

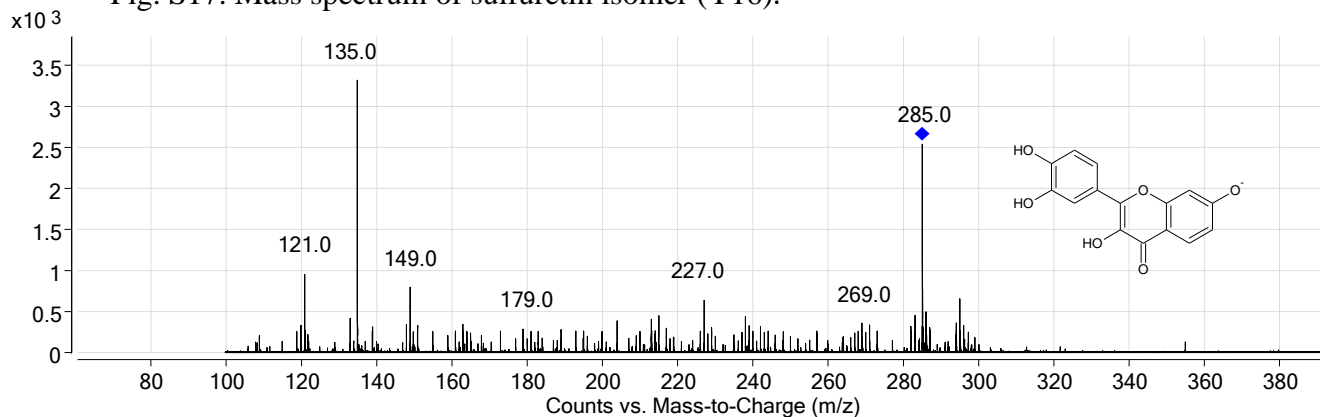

Fig. S18. Mass spectrum of fistein (Y17).

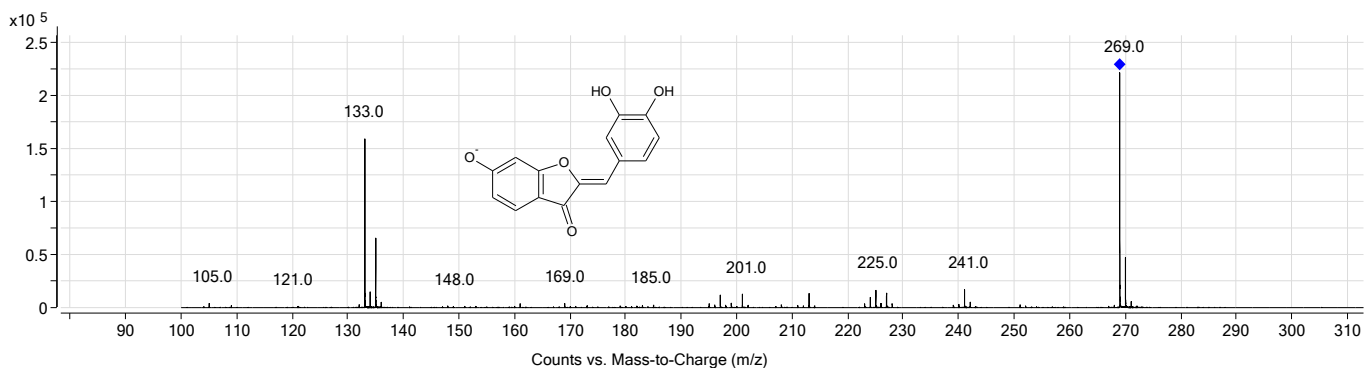

Fig. S19. Mass spectrum of sulfuretin (Y18).

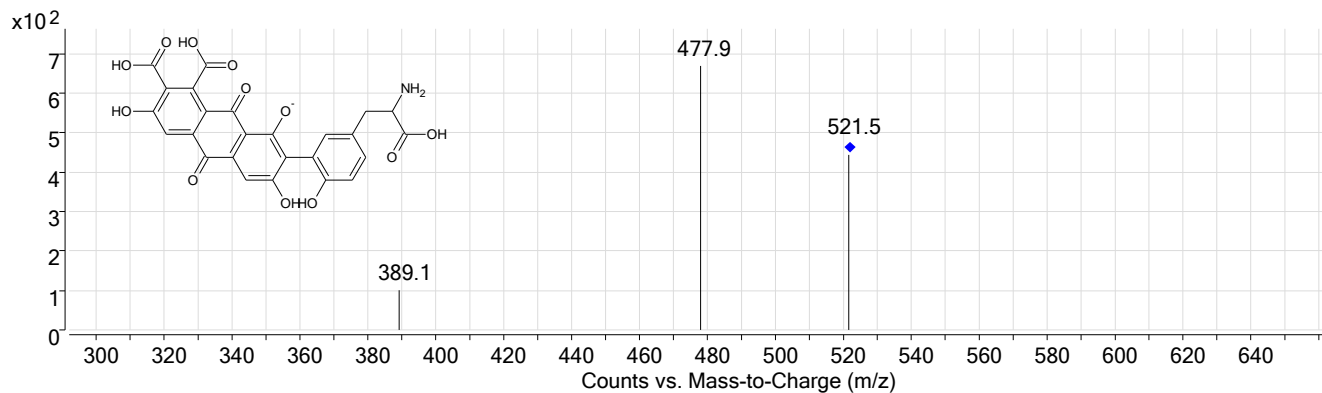

Fig. S20. Mass spectrum of xantholaccaic acid C (R1).

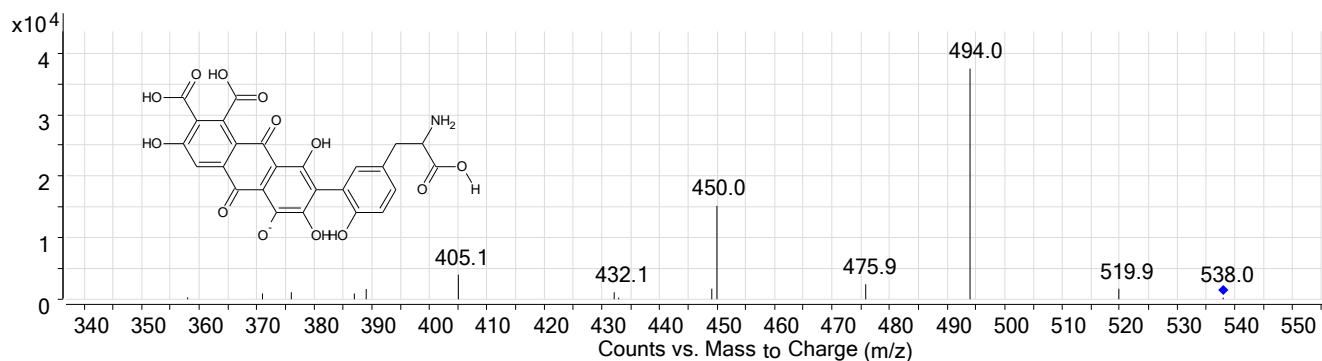

Fig. S21. Mass spectrum of laccaic acid C (R2).

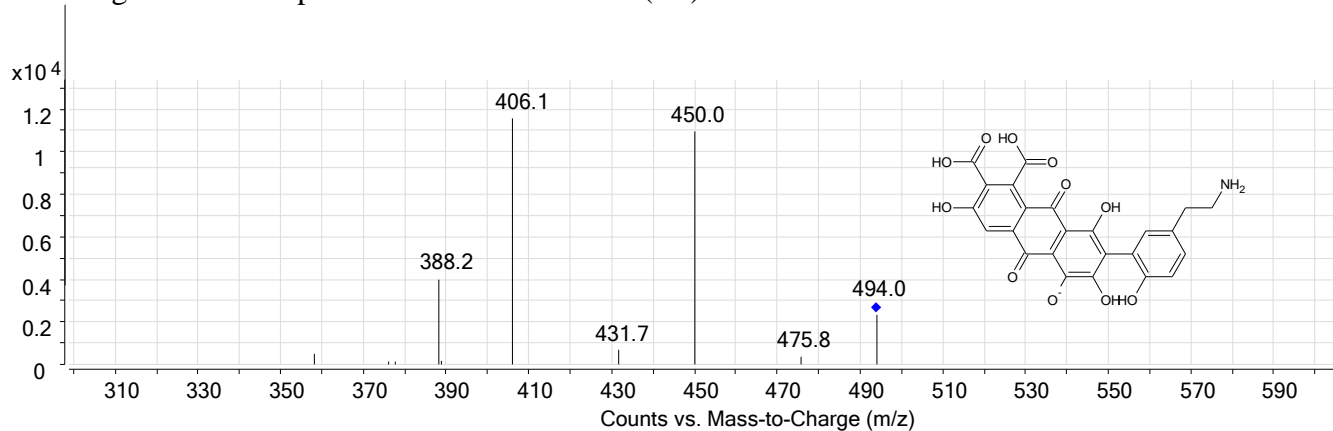

Fig. S22. Mass spectrum of laccaic acid E (R3).

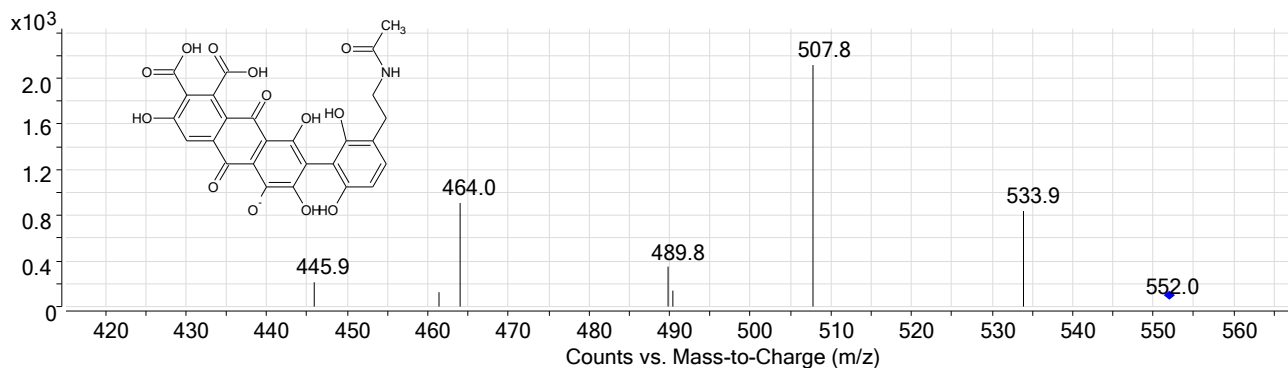

Fig. S23. Mass spectrum of derivative of laccaic acid A (R4).

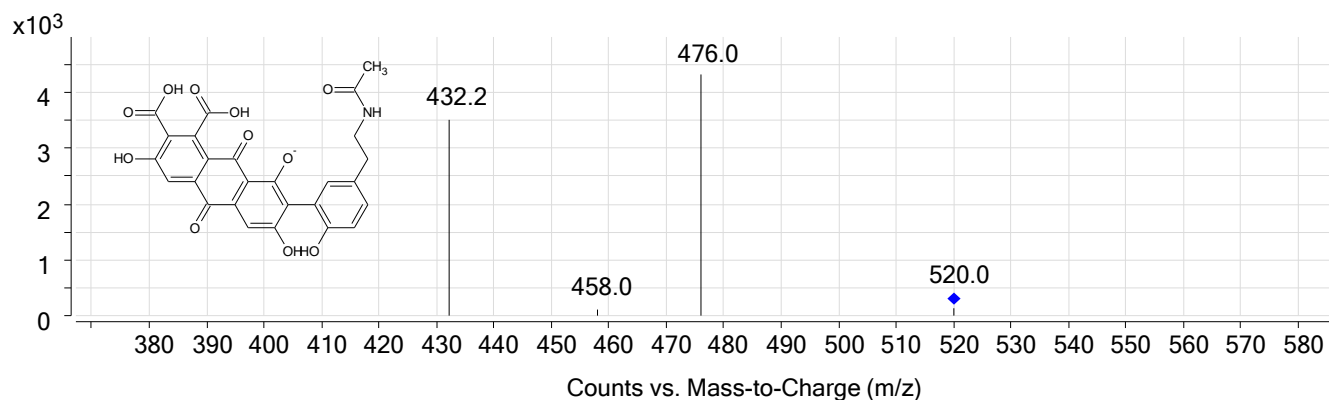

Fig. S24. Mass spectrum of derivative of xantholaccaic acid A (R5).

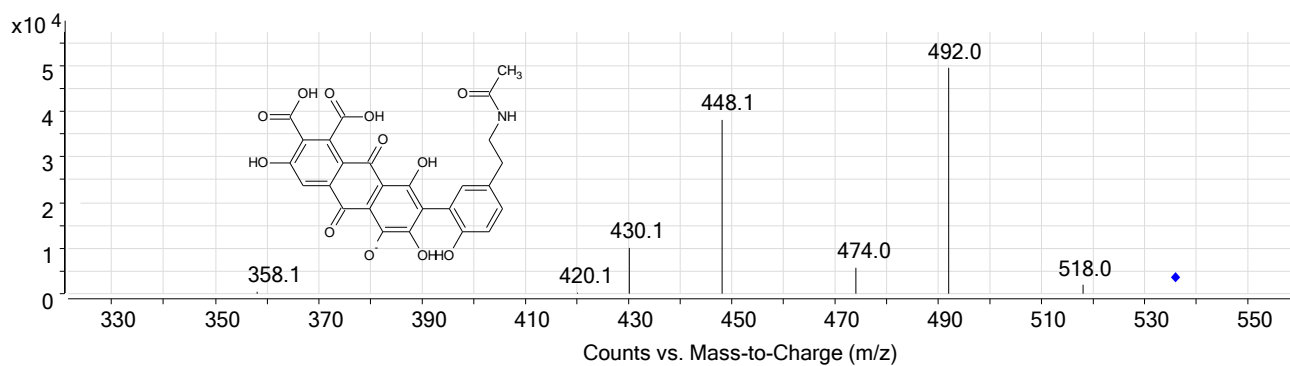

Fig. S25. Mass spectrum of laccaic acid A (R6).

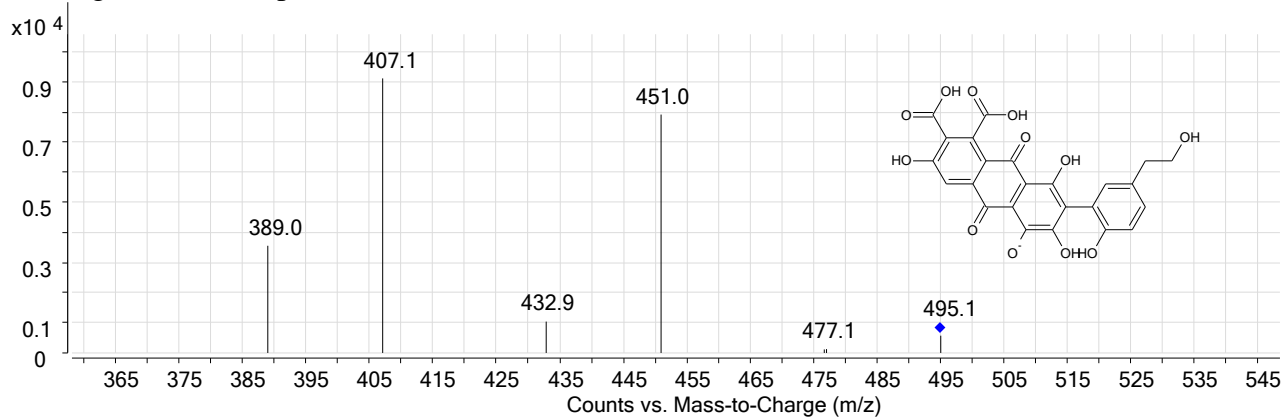

Fig. S26. Mass spectrum of laccaic acid B (R7).

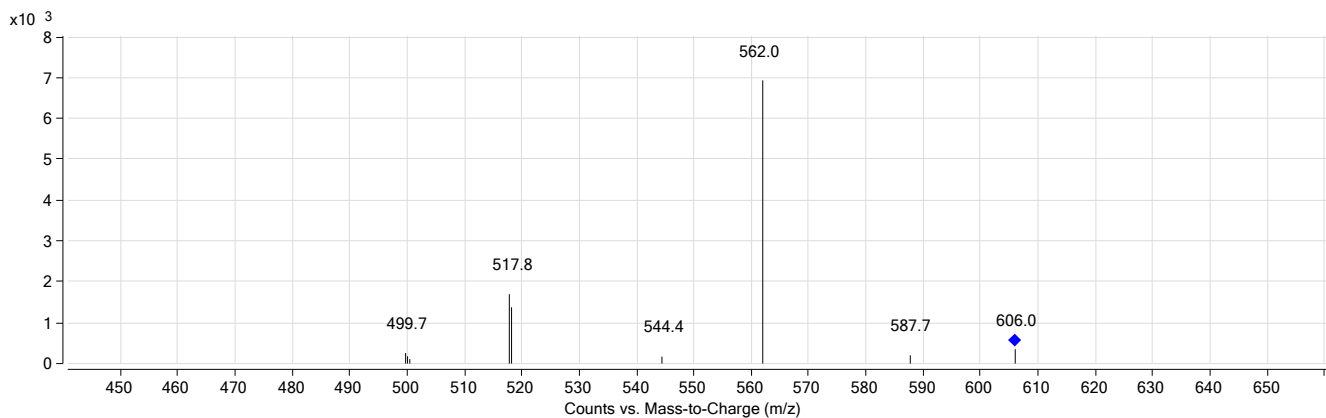

Fig. S27. Mass spectrum of unknown compound (R8).

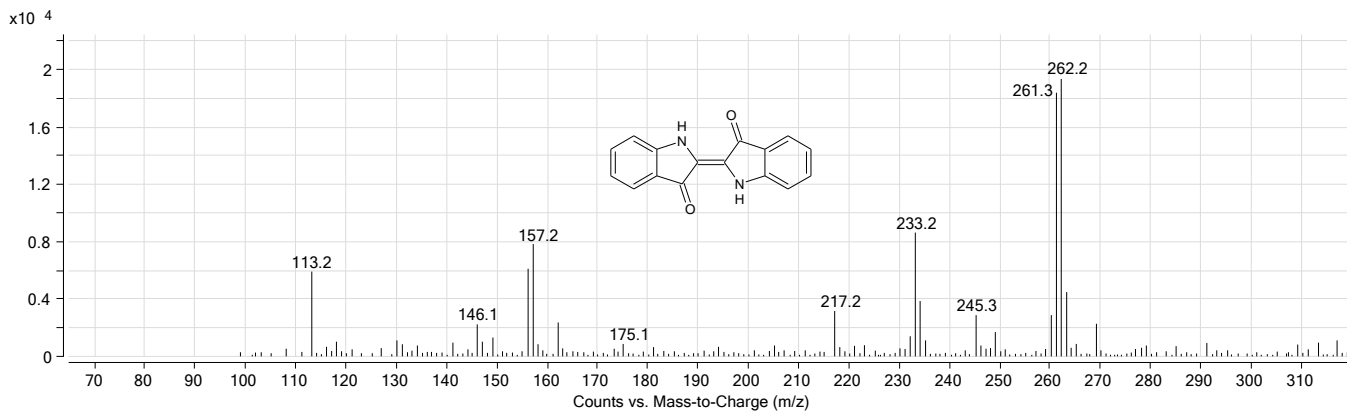

Fig. S28. Mass spectrum of indigotin (B1).

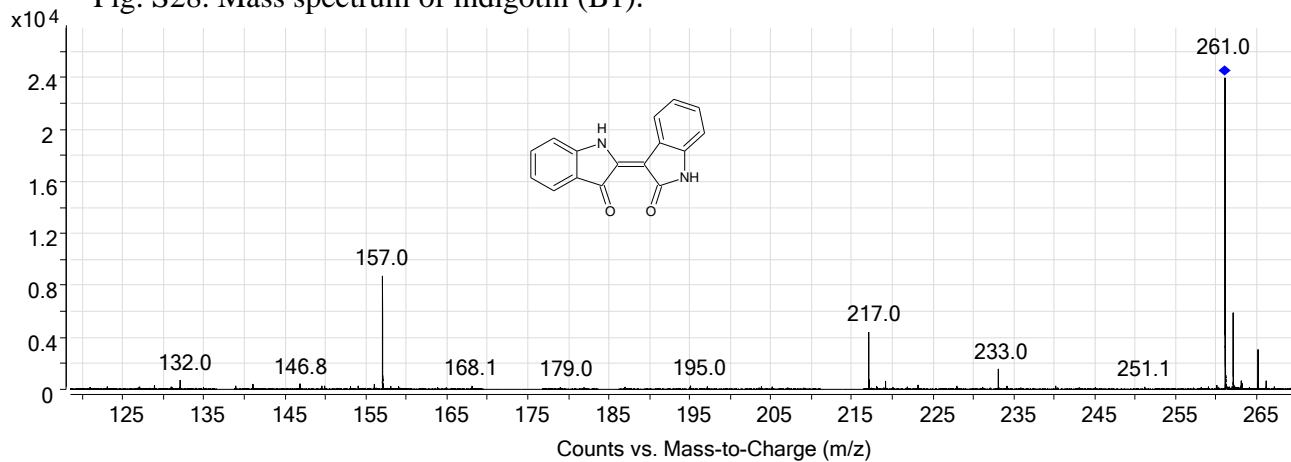

Fig. S29. Mass spectrum of indirubin (B2).

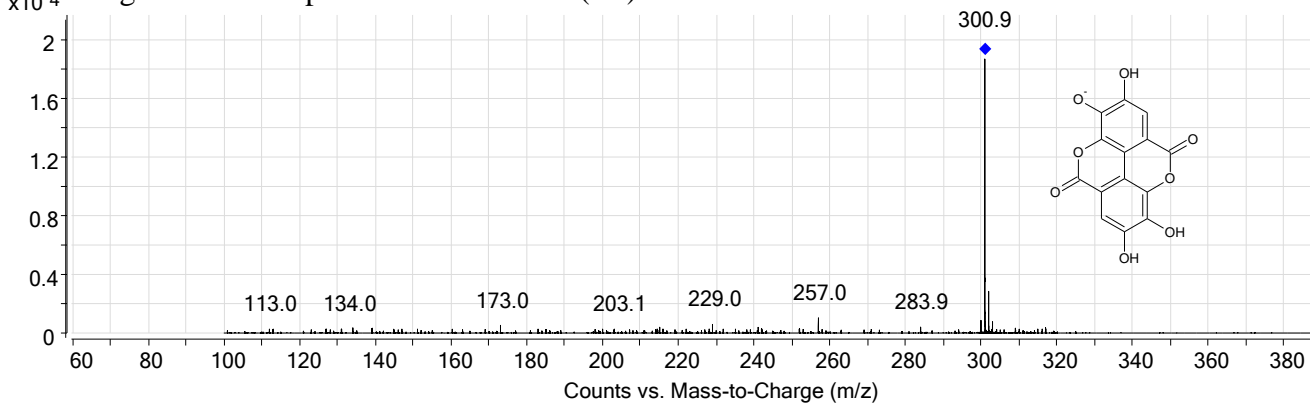

Fig. S30. Mass spectrum of ellagic acid (BR1).

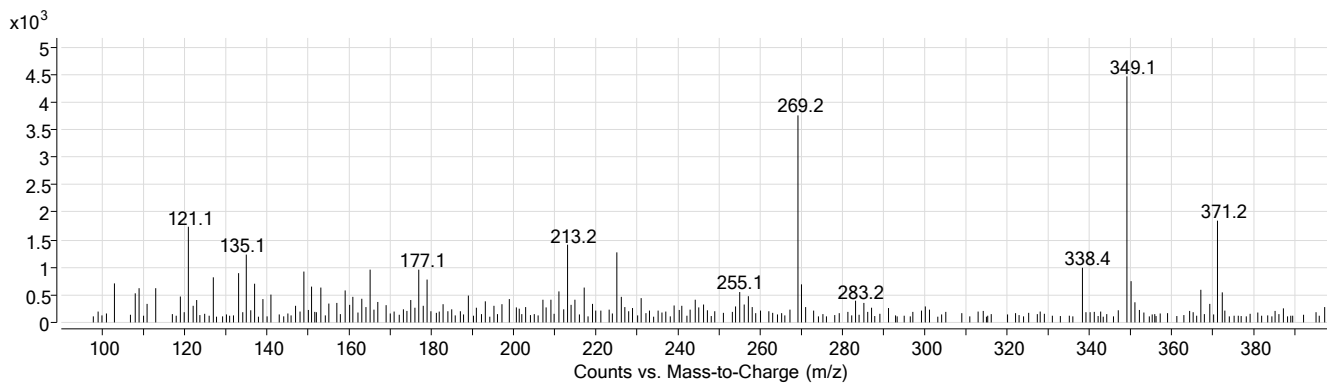

Fig. S31. Mass spectrum of compound (Y14).

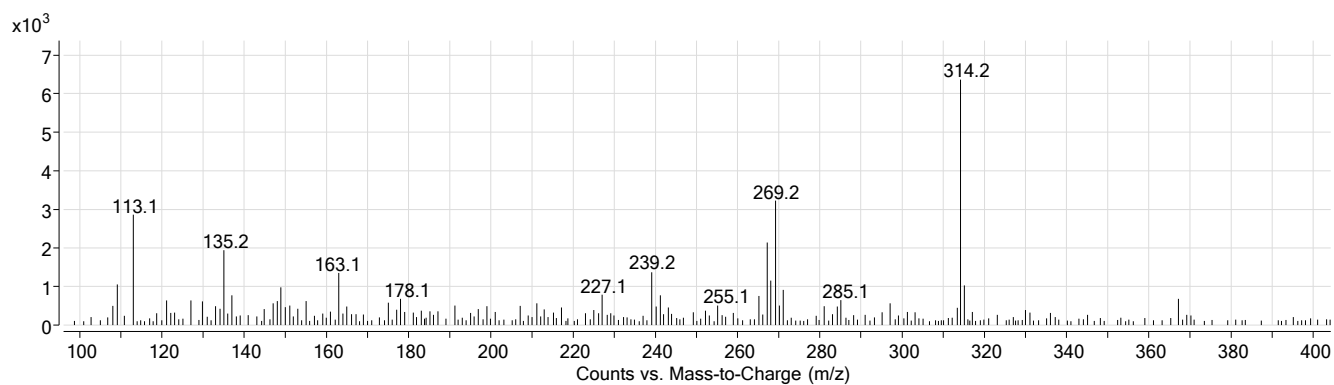

Fig. S32. Mass spectrum of compound (Y19).

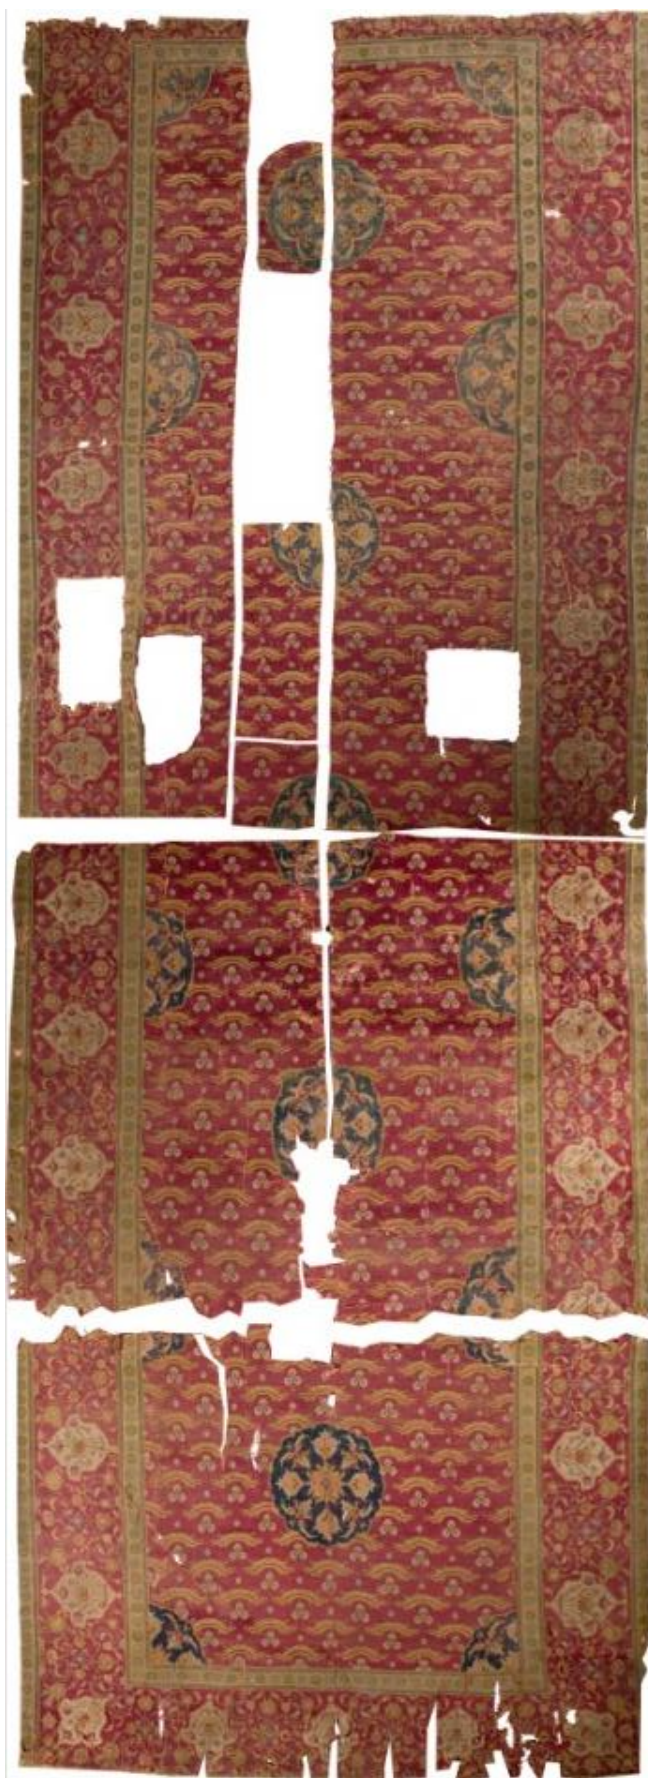

Fig. S33. Historical carpet with Chintamani motifs  
(National Museum in Krakow, Poland collection MNK XIX-8950)
